# Supplementary material
Source: PubMed Central journal article supplement (PMC9725777)
Supplement: mmc1.pdf [file mmc1.pdf]

# THE LANCET Microbe

## Supplementary appendix

This appendix formed part of the original submission. We post it as supplied by the authors.

Supplement to: Zhang, X, Chen L-L, Ip JD, et al. Omicron sublineage recombinant XBB evades neutralising antibodies in recipients of BNT162b2 or CoronaVac vaccines. *Lancet Microbe* 2022; published online December 6. [https://doi.org/10.1016/S2666-5247\(22\)00335-4](https://doi.org/10.1016/S2666-5247(22)00335-4).

1  
2

## Supplementary Appendix

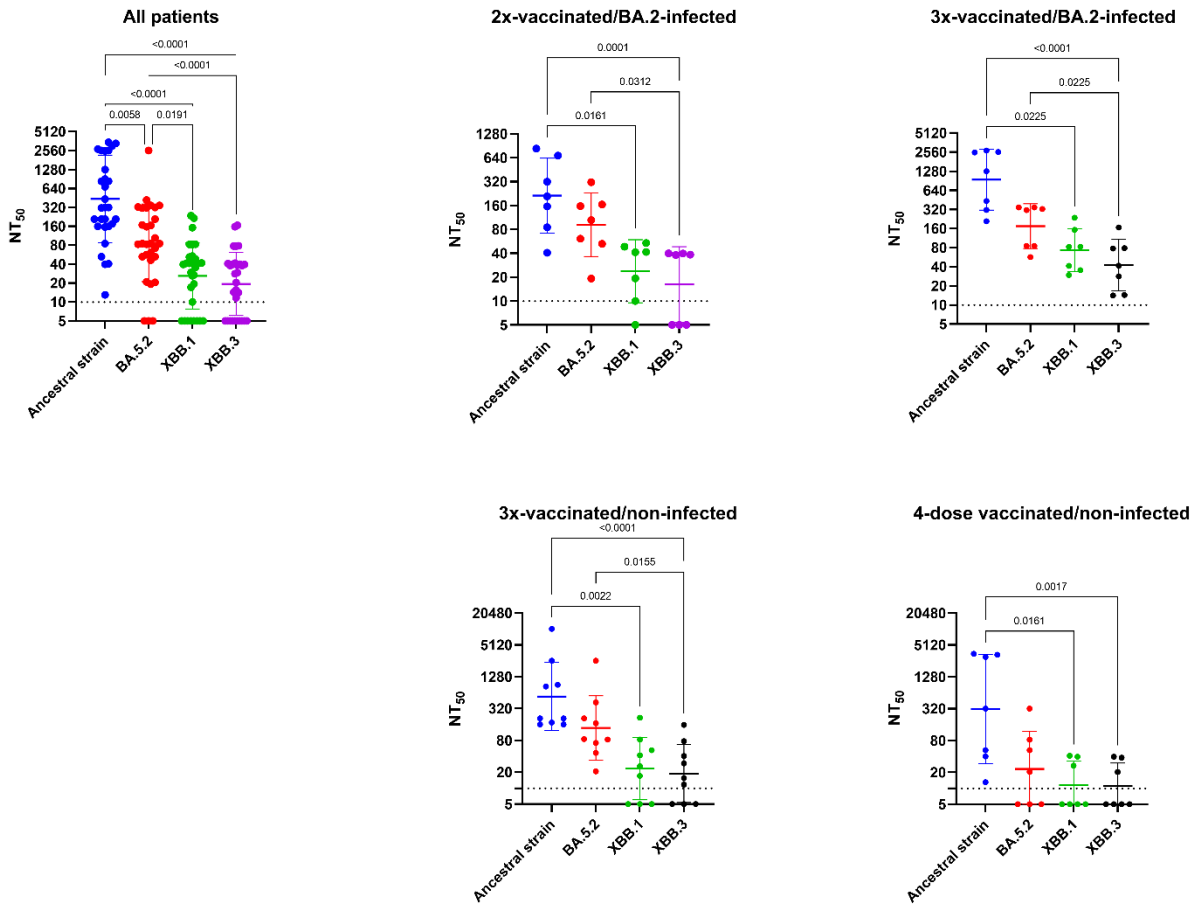

3  
4  
5  
6  
7  
8

**Supplementary Figure S1.** Comparison of live virus neutralising antibody titers against ancestral strain and Omicron sublineages BA.5.2, XBB.1 and XBB.3 for individuals with different history of vaccination and infection. Dotted horizontal lines represent the lower limit of detection. P values were shown if <0.05. NT<sub>50</sub>, 50% neutralisation titer

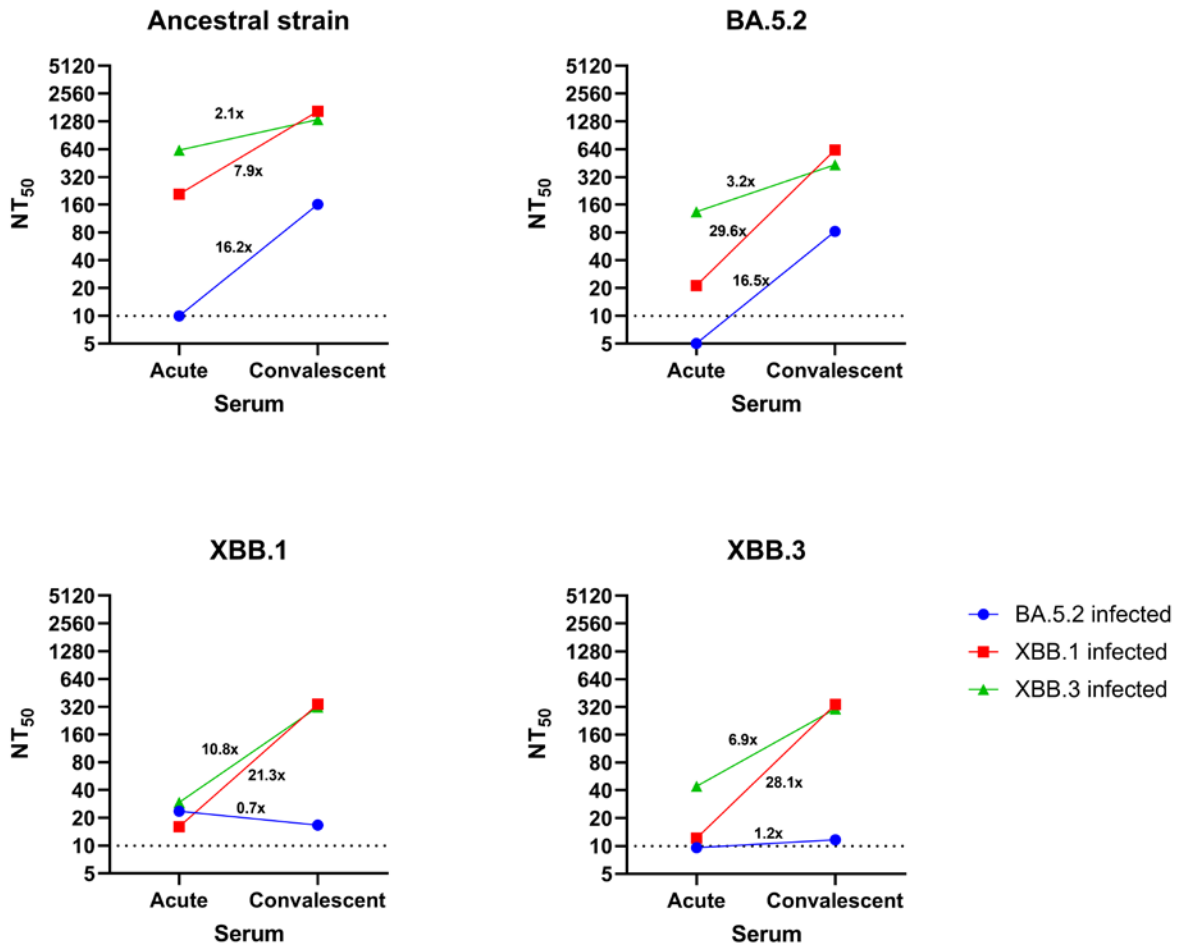

9

10

| Patient                | Collection date<br>(Days after symptom onset) |                    | No. of vaccine<br>doses received | Type of vaccine |
|------------------------|-----------------------------------------------|--------------------|----------------------------------|-----------------|
|                        | Acute serum                                   | Convalescent serum |                                  |                 |
| <b>BA.5.2 infected</b> | 3                                             | 39                 | 2                                | BNT162b2        |
| <b>XBB.1 infected</b>  | 5                                             | 18                 | 3                                | BNT162b2        |
| <b>XBB.3 infected</b>  | 3                                             | 18                 | 4                                | BNT162b2        |

11

12 **Supplementary Figure S2.** Comparison of live virus neutralising antibody titers against  
 13 ancestral strain and Omicron sublineages BA.5.2, XBB.1 and XBB.3 for the 3 patients  
 14 with acute and convalescent serum specimens available. Details of the 3 infected patient  
 15 are shown in the table. The fold increase 50% neutralisation titer between acute and  
 16 convalescent sera is shown. Dotted horizontal lines represent the lower limit of detection.  
 17 NT50, 50% neutralisation titer  
 18

19 **Supplementary Table S1.** Characteristics of study participants

|                                                                         | <b>2x-vaccinated/<br/>BA.2 infected<br/>(n=7)</b> | <b>3x-vaccinated/<br/>BA.2 infected<br/>(n=7)</b> | <b>3x-vaccinated/<br/>non-infected<br/>(n=9)</b> | <b>4x-vaccinated/<br/>non-infected<br/>(n=7)</b> | <b>Total<br/>(n=30)</b> |
|-------------------------------------------------------------------------|---------------------------------------------------|---------------------------------------------------|--------------------------------------------------|--------------------------------------------------|-------------------------|
| <b>Demographics</b>                                                     |                                                   |                                                   |                                                  |                                                  |                         |
| Age in years, median (range)                                            | 52 (44-59)                                        | 51 (41-59)                                        | 58 (53-73)                                       | 72 (70-86)                                       | 57 (49-71)              |
| Female sex                                                              | 6 (85.7)                                          | 5 (71.4)                                          | 6 (66.7)                                         | 4 (57.1)                                         | 21 (70)                 |
| <b>Vaccine type</b>                                                     |                                                   |                                                   |                                                  |                                                  |                         |
| BNT162b2                                                                | 4 (57.1)                                          | 4 (57.1)                                          | 6 (66.7)                                         | 3 (42.9)                                         | 17 (56.7)               |
| CoronaVac                                                               | 3 (42.9)                                          | 3 (42.9)                                          | 3 (33.3)                                         | 4 (57.1)                                         | 13 (43.3)               |
| <b>Interval between vaccination/infection and serum collection date</b> |                                                   |                                                   |                                                  |                                                  |                         |
| 1 <sup>st</sup> vaccine dose and serum collection                       | 350 (336-365)                                     | 350 (344-372)                                     | 364 (315-391)                                    | 491 (450-494)                                    | N/A                     |
| 2 <sup>nd</sup> vaccine dose and serum collection                       | 322 (311-344)                                     | 329 (311-344)                                     | 339 (287-366)                                    | 464 (429-470)                                    | N/A                     |
| 3 <sup>rd</sup> vaccine dose and serum collection                       | N/A                                               | 116 (85-148)                                      | 126 (92-146)                                     | 215 (197-232)                                    | N/A                     |
| 4 <sup>th</sup> vaccine dose and serum collection                       | N/A                                               | N/A                                               | N/A                                              | 89 (82-111)                                      | N/A                     |
| Infection <sup>a</sup> and serum collection                             | 140 (135-150)                                     | 104 (21-130)                                      | N/A                                              | N/A                                              | N/A                     |

20 Data are expressed as no. (%) unless otherwise specified

21 N/A, not applicable

22 <sup>a</sup> Defined as the date of diagnosis

## 23 **METHODS**

### 24 **Serum specimens**

25 Serum specimens were collected in our ongoing prospective cohort study which enrolled  
26 COVID-19 vaccine recipients and COVID-19 patients in Hong Kong<sup>1</sup>. Details these  
27 demographics, vaccine type, interval between vaccine doses and serum collection, and interval  
28 between infection and serum collection were documented. The study has been approved by the  
29 Institutional Review Board of the University of Hong Kong/Hospital Authority Hong Kong West  
30 Cluster (UW 21-214 and UW 13-265). Written informed consent were obtained from all study  
31 participants.

### 33 **Viral culture**

34 Viral culture was performed in a biosafety level 3 facility as we described previously  
35 with slight modifications<sup>2,3</sup>. Briefly, TMPRSS2-expressing VeroE6 (VeroE6/TMPRSS2) cells  
36 (JCRB Cat#JCRB1819) were seeded with 1 mL of minimum essential medium (MEM) (Gibco®,  
37 Thermo Fisher Scientific) with 10% fetal bovine serum (FBS) and 5 mg/mL G418 (Gibco®,  
38 Thermo Fisher Scientific) at  $1 \times 10^5$  cells in a shell vial (Diagnostic Hybrids, Inc). The plates  
39 were incubated at 37°C in a carbon dioxide incubator until confluence for inoculation. Each well  
40 was inoculated with 100 µL of clinical specimen. One hour after incubation, the clinical  
41 specimen was removed and cells were replenished with 1 mL of MEM medium with 1% FBS,  
42 100 U/ml penicillin-streptomycin, 100 U/ml of nystatin, and 25 mM HEPES (Gibco®,  
43 ThermoFisher Scientific). The cells were incubated at 37°C with 5% CO<sub>2</sub> and observed 2-3  
44 times per day for virus-induced cytopathic effect (CPE). Cultures with more than 50% virus-  
45 induced CPE were expanded to large volume in VeroE6/TMPRSS2 cells with the same culture  
46 condition. The 50% tissue culture infective doses (TCID<sub>50</sub>) were determined in

47 VeroE6/TMPRSS2 cells. The whole genome sequence of the culture isolates was determined  
48 using nanopore sequencing (Oxford Nanopore Technologies).

49

### 50 **Live virus neutralising antibody assay**

51 Live virus neutralising antibody (nAb) assay was performed as we described previously <sup>4</sup>  
52 <sup>6</sup>. The SARS-CoV-2 BA.5.2 isolate (GISAID accession number EPI\_ISL\_13777658), XBB.1  
53 isolate (GISAID accession number EPI\_ISL\_15602393), and XBB.3 isolate (GISAID accession  
54 number EPI\_ISL\_15602394) were isolated in this study. The ancestral strain (GISAID  
55 accession number: EPI\_ISL\_434571) was isolated from previous studies <sup>3</sup>. Briefly, serum  
56 samples were heat-inactivated at 56°C for 30 min and were serially diluted in 2-folds with MEM  
57 containing 1% FBS. Duplicates of each diluted serum were mixed with a SARS-CoV-2 virus  
58 isolate to reach a final concentration of 100 TCID<sub>50</sub> and were incubated at 37°C for 1 hour. After  
59 incubation, 100 µL of the serum-virus mixture was then added to VeroE6/TMPRSS2 cells that  
60 were seeded in 96-well plates 24 hours before infection. The cells were incubated with the  
61 mixture at 37°C. After incubation for 3 days, CPE was visually scored for each well by two  
62 independent observers. The 50% neutralisation titer (NT<sub>50</sub>) was determined by using log  
63 (inhibitor) vs normalized response- variable slope in GraphPad PRISM version 9.4.0. For  
64 statistical analysis, a value of 5 was assigned if the live virus neutralising antibody titer is <10.

65

### 66 **Statistical analysis**

67 We did statistical analysis using PRISM 9.4.0. NT<sub>50</sub> against ancestral strain, BA.5.2,  
68 XBB.1 and XBB.3 were compared using one way ANOVA and corrected for multiple

69 comparison using Dunn's multiple comparisons test. A *P* value of less than 0.05 was judged  
70 statistically significant.

71

## 72 REFERENCES

- 73 1. Khong K-W, Liu D, Leung K-Y, et al. Antibody Response of Combination of BNT162b2  
74 and CoronaVac Platforms of COVID-19 Vaccines against Omicron Variant. *Vaccines* 2022;  
75 **10**(2): 160.
- 76 2. Chen LL, Chu AW, Zhang RR, Hung IF, To KK. Serum neutralisation of the SARS-  
77 CoV-2 omicron sublineage BA.2. *Lancet Microbe* 2022; **3**(6): e404.
- 78 3. Chen LL, Abdullah SMU, Chan WM, et al. Contribution of low population immunity to  
79 the severe Omicron BA.2 outbreak in Hong Kong. *Nat Commun* 2022; **13**(1): 3618.
- 80 4. Chen LL, Chua GT, Lu L, et al. Omicron variant susceptibility to neutralizing antibodies  
81 induced in children by natural SARS-CoV-2 infection or COVID-19 vaccine. *Emerg Microbes*  
82 *Infect* 2022; 10.1080/22221751.2022.2035195: 1-17.
- 83 5. Lu L, Mok BW, Chen LL, et al. Neutralization of SARS-CoV-2 Omicron variant by sera  
84 from BNT162b2 or Coronavac vaccine recipients. *Clin Infect Dis* 2021; 10.1093/cid/ciab1041:  
85 ciab1041. doi: 10.93/cid/ciab.
- 86 6. To KK, Tsang OT, Leung WS, et al. Temporal profiles of viral load in posterior  
87 oropharyngeal saliva samples and serum antibody responses during infection by SARS-CoV-2:  
88 an observational cohort study. *Lancet Infect Dis* 2020; **20**(5): 565-74.

89

90
